# Supplementary material
Source: Springer Nature journal article supplement (https://www.springermedizin.de/resource/supplementary/12885_2008_1307_MOESM4_ESM.pdf/9471714)

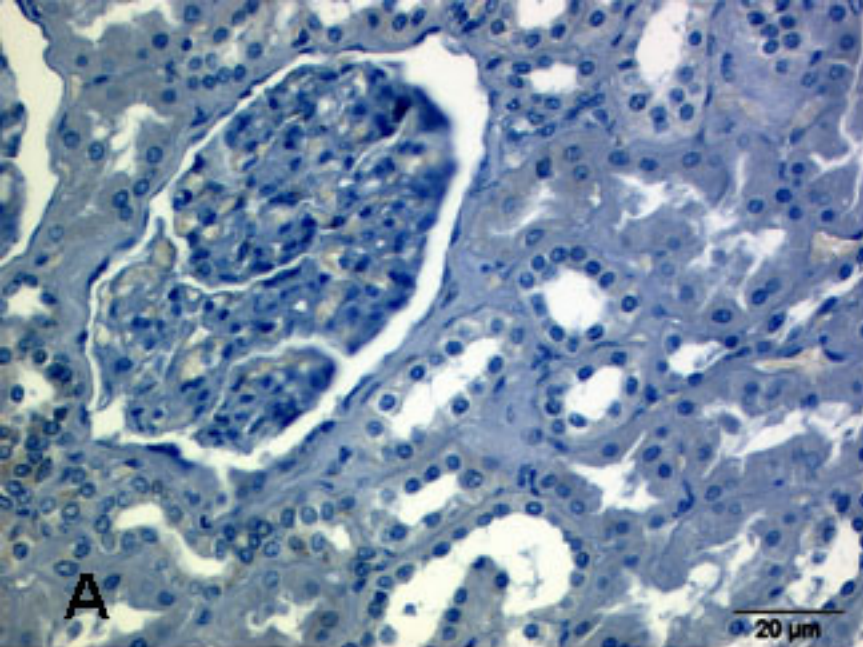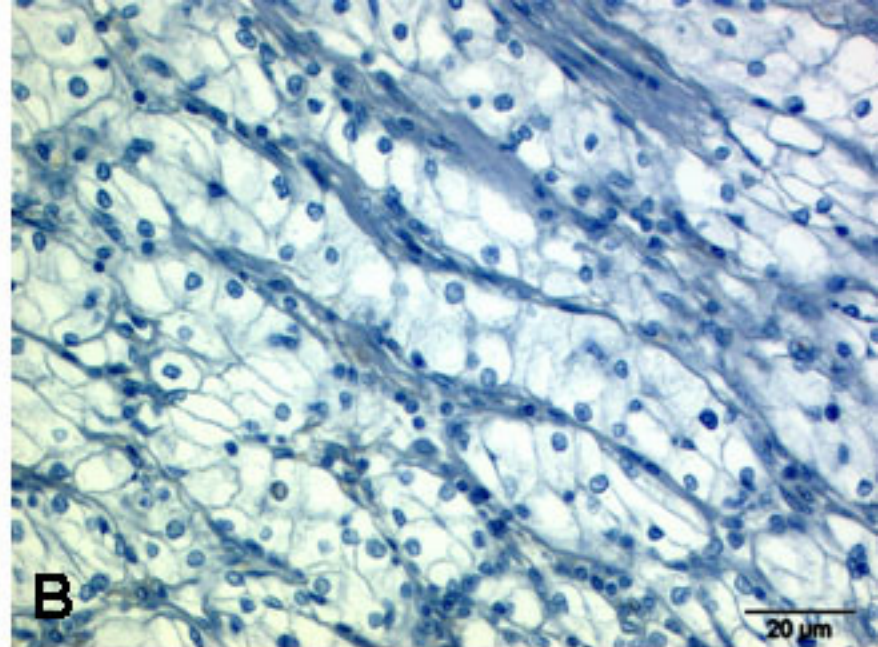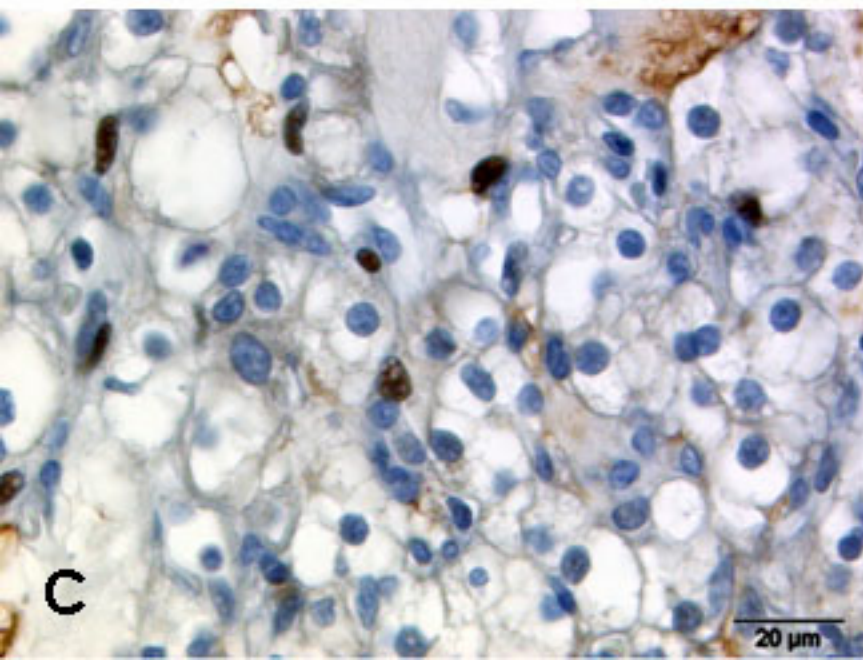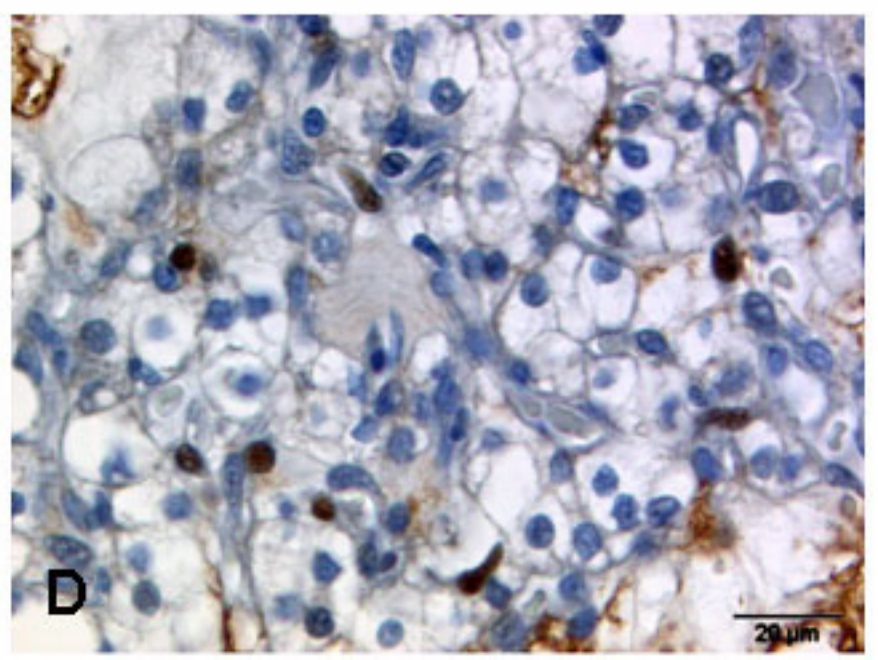

Supplement: MOESM4 [file 9471714]
